# Supplementary material
Source: publisher site journal article supplement (https://www.dovepress.com/article/396819)
Supplement: Supplementary file 1 [file get_supplementary_file.php]

**Supplementary Table 1: IRRs of treatment regimens by decile groups of the observed over expected ratio**

| OE group | Talk therapy | Psychologist | Psychiatric hospital | Psychiatrist | Anti­depressants | Antipsychotics | Anxiolytics | Antidementia drugs | Suicide | First-time  anti­depressants | First-time  antipsychotics | First-time  anxiolytics | First-time  antidementia drugs |
| --- | --- | --- | --- | --- | --- | --- | --- | --- | --- | --- | --- | --- | --- |
| m0 (unadjusted) | | | | | | | | | | | | | |
| 1 | 0.37 (0.29;0.49) | 0.82 (0.73;0.92) | 1.11 (0.98;1.25) | 0.91 (0.78;1.07) | 1.00 (0.91;1.09) | 1.06 (0.94;1.19) | 1.52 (1.32;1.75) | 1.21 (0.99;1.47) | 1.27 (0.81;1.98) | 0.98 (0.89;1.08) | 1.08 (0.96;1.21) | 1.19 (1.07;1.33) | 0.95 (0.76;1.18) |
| 2 | 0.51 (0.41;0.63) | 0.92 (0.82;1.02) | 1.05 (0.95;1.17) | 0.98 (0.84;1.14) | 1.03 (0.94;1.12) | 1.09 (0.96;1.22) | 1.18 (1.04;1.34) | 1.07 (0.88;1.29) | 0.91 (0.56;1.48) | 0.97 (0.89;1.05) | 1.01 (0.91;1.13) | 1.02 (0.92;1.13) | 0.99 (0.80;1.23) |
| 3 | 0.71 (0.59;0.85) | 0.94 (0.86;1.04) | 1.05 (0.94;1.17) | 1.02 (0.88;1.19) | 1.08 (0.99;1.17) | 1.16 (1.04;1.31) | 1.18 (1.04;1.33) | 1.11 (0.94;1.31) | 0.97 (0.62;1.50) | 1.03 (0.94;1.12) | 1.08 (0.97;1.21) | 1.02 (0.91;1.15) | 0.98 (0.80;1.19) |
| 4 | 0.81 (0.68;0.97) | 0.92 (0.84;1.01) | 1.08 (0.97;1.20) | 0.93 (0.80;1.08) | 1.04 (0.96;1.13) | 1.12 (0.99;1.26) | 1.05 (0.93;1.19) | 1.14 (0.98;1.34) | 0.84 (0.52;1.34) | 1.04 (0.96;1.13) | 1.08 (0.98;1.20) | 0.99 (0.89;1.09) | 1.03 (0.85;1.25) |
| 5 | 0.87 (0.72;1.04) | 0.97 (0.89;1.07) | 0.99 (0.89;1.09) | 0.95 (0.82;1.11) | 1.03 (0.95;1.11) | 0.97 (0.88;1.08) | 1.00 (0.88;1.13) | 1.09 (0.92;1.30) | 0.84 (0.52;1.36) | 0.99 (0.91;1.07) | 1.06 (0.96;1.17) | 0.92 (0.83;1.02) | 1.07 (0.89;1.29) |
| 6 | 0.90 (0.76;1.08) | 0.93 (0.84;1.03) | 1.02 (0.92;1.12) | 1.01 (0.87;1.18) | 1.01 (0.94;1.09) | 0.99 (0.90;1.10) | 0.91 (0.81;1.03) | 1.13 (0.95;1.33) | 1.21 (0.80;1.84) | 0.99 (0.91;1.07) | 1.03 (0.93;1.14) | 0.89 (0.81;0.99) | 1.07 (0.87;1.30) |
| 7 (ref.) | 1.00 (ref.) | 1.00 (ref.) | 1.00 (ref.) | 1.00 (ref.) | 1.00 (ref.) | 1.00 (ref.) | 1.00 (ref.) | 1.00 (ref.) | 1.00 (ref.) | 1.00 (ref.) | 1.00 (ref.) | 1.00 (ref.) | 1.00 (ref.) |
| 8 | 1.16 (0.98;1.38) | 0.99 (0.91;1.09) | 1.02 (0.92;1.13) | 0.93 (0.80;1.08) | 1.02 (0.94;1.11) | 0.95 (0.86;1.06) | 0.95 (0.84;1.08) | 1.29 (1.08;1.55) | 0.77 (0.49;1.22) | 1.02 (0.93;1.11) | 1.03 (0.92;1.15) | 0.95 (0.86;1.05) | 1.04 (0.85;1.27) |
| 9 | 1.37 (1.15;1.62) | 1.04 (0.94;1.16) | 1.08 (0.98;1.19) | 1.06 (0.92;1.22) | 1.02 (0.94;1.12) | 1.07 (0.95;1.19) | 1.01 (0.89;1.15) | 1.20 (0.99;1.46) | 0.74 (0.47;1.18) | 1.07 (0.99;1.17) | 0.97 (0.87;1.08) | 0.92 (0.83;1.02) | 1.02 (0.83;1.24) |
| 10 | 1.50 (1.25;1.80) | 1.12 (1.01;1.23) | 1.18 (1.07;1.31) | 0.98 (0.85;1.14) | 1.05 (0.96;1.13) | 1.04 (0.93;1.17) | 1.01 (0.89;1.15) | 1.26 (1.06;1.50) | 0.80 (0.48;1.32) | 1.09 (1.01;1.19) | 1.07 (0.96;1.20) | 1.01 (0.91;1.13) | 1.16 (0.94;1.43) |
| m1 (adjusted for age, sex, and calendar time) | | | | | | | | | | | | | |
| 1 | 0.39 (0.30;0.51) | 0.86 (0.77;0.97) | 1.13 (1.01;1.27) | 0.94 (0.81;1.09) | 0.99 (0.91;1.07) | 1.05 (0.94;1.18) | 1.50 (1.31;1.71) | 1.22 (1.00;1.49) | 1.22 (0.78;1.92) | 0.97 (0.88;1.07) | 1.06 (0.94;1.19) | 1.19 (1.07;1.32) | 0.95 (0.76;1.18) |
| 2 | 0.51 (0.41;0.64) | 0.95 (0.86;1.05) | 1.08 (0.98;1.18) | 1.00 (0.87;1.16) | 1.00 (0.92;1.09) | 1.07 (0.95;1.21) | 1.14 (1.00;1.29) | 1.09 (0.90;1.31) | 0.89 (0.55;1.45) | 0.96 (0.88;1.04) | 1.00 (0.90;1.12) | 1.00 (0.91;1.11) | 1.00 (0.81;1.24) |
| 3 | 0.72 (0.60;0.87) | 0.99 (0.90;1.09) | 1.08 (0.97;1.19) | 1.05 (0.90;1.21) | 1.05 (0.97;1.14) | 1.15 (1.03;1.29) | 1.13 (1.01;1.27) | 1.13 (0.96;1.33) | 0.94 (0.61;1.45) | 1.02 (0.93;1.11) | 1.07 (0.96;1.19) | 1.00 (0.89;1.12) | 0.98 (0.81;1.20) |
| 4 | 0.82 (0.69;0.98) | 0.96 (0.88;1.04) | 1.11 (1.00;1.23) | 0.94 (0.81;1.10) | 1.02 (0.95;1.10) | 1.10 (0.98;1.24) | 1.02 (0.91;1.15) | 1.16 (0.99;1.36) | 0.81 (0.51;1.30) | 1.03 (0.95;1.12) | 1.07 (0.97;1.18) | 0.97 (0.88;1.07) | 1.04 (0.85;1.25) |
| 5 | 0.88 (0.74;1.05) | 1.02 (0.93;1.11) | 1.01 (0.93;1.11) | 0.97 (0.84;1.13) | 1.01 (0.94;1.08) | 0.96 (0.87;1.07) | 0.98 (0.87;1.10) | 1.11 (0.93;1.32) | 0.82 (0.51;1.32) | 0.98 (0.90;1.06) | 1.05 (0.95;1.16) | 0.91 (0.82;1.00) | 1.07 (0.89;1.30) |
| 6 | 0.91 (0.77;1.08) | 0.93 (0.85;1.03) | 1.02 (0.94;1.11) | 1.02 (0.88;1.18) | 1.00 (0.94;1.08) | 0.99 (0.90;1.09) | 0.91 (0.81;1.02) | 1.14 (0.96;1.34) | 1.20 (0.80;1.82) | 0.98 (0.91;1.07) | 1.03 (0.93;1.14) | 0.89 (0.81;0.98) | 1.07 (0.88;1.31) |
| 7 (ref.) | 1.00 (ref.) | 1.00 (ref.) | 1.00 (ref.) | 1.00 (ref.) | 1.00 (ref.) | 1.00 (ref.) | 1.00 (ref.) | 1.00 (ref.) | 1.00 (ref.) | 1.00 (ref.) | 1.00 (ref.) | 1.00 (ref.) | 1.00 (ref.) |
| 8 | 1.16 (0.98;1.38) | 1.01 (0.92;1.10) | 1.03 (0.94;1.13) | 0.93 (0.81;1.08) | 1.01 (0.94;1.10) | 0.95 (0.85;1.05) | 0.94 (0.83;1.06) | 1.30 (1.09;1.55) | 0.77 (0.48;1.21) | 1.02 (0.93;1.11) | 1.03 (0.93;1.15) | 0.95 (0.86;1.04) | 1.04 (0.85;1.27) |
| 9 | 1.36 (1.15;1.60) | 1.02 (0.92;1.12) | 1.06 (0.97;1.16) | 1.05 (0.92;1.20) | 1.04 (0.96;1.12) | 1.08 (0.97;1.20) | 1.04 (0.92;1.17) | 1.20 (1.00;1.46) | 0.76 (0.48;1.20) | 1.07 (0.99;1.17) | 0.97 (0.87;1.08) | 0.93 (0.84;1.03) | 1.02 (0.83;1.24) |
| 10 | 1.50 (1.25;1.79) | 1.08 (0.98;1.18) | 1.14 (1.04;1.25) | 0.97 (0.84;1.12) | 1.09 (1.01;1.18) | 1.07 (0.95;1.20) | 1.07 (0.95;1.21) | 1.26 (1.06;1.50) | 0.82 (0.50;1.36) | 1.10 (1.01;1.20) | 1.07 (0.96;1.20) | 1.04 (0.93;1.15) | 1.16 (0.94;1.43) |
| m2 (adjusted as m1 + immigration status, cohabitation status, educational level, income, and somatic comorbidities) | | | | | | | | | | | | | |
| 1 | 0.39 (0.29;0.51) | 0.89 (0.80;0.99) | 1.03 (0.93;1.15) | 0.90 (0.78;1.05) | 0.94 (0.88;1.01) | 0.95 (0.86;1.04) | 1.39 (1.23;1.57) | 1.21 (0.99;1.48) | 1.14 (0.73;1.77) | 0.93 (0.85;1.02) | 1.01 (0.90;1.13) | 1.16 (1.05;1.29) | 0.96 (0.78;1.19) |
| 2 | 0.51 (0.41;0.64) | 0.97 (0.88;1.06) | 1.04 (0.95;1.13) | 0.99 (0.85;1.15) | 0.98 (0.92;1.05) | 1.03 (0.93;1.13) | 1.10 (0.98;1.23) | 1.09 (0.91;1.32) | 0.87 (0.53;1.41) | 0.93 (0.86;1.02) | 0.99 (0.89;1.10) | 0.99 (0.90;1.10) | 1.02 (0.82;1.25) |
| 3 | 0.72 (0.60;0.86) | 1.00 (0.91;1.10) | 1.04 (0.94;1.14) | 1.03 (0.89;1.20) | 1.03 (0.96;1.09) | 1.10 (1.00;1.20) | 1.09 (0.98;1.21) | 1.13 (0.96;1.34) | 0.91 (0.59;1.41) | 1.00 (0.92;1.09) | 1.05 (0.95;1.17) | 0.99 (0.88;1.11) | 0.99 (0.82;1.21) |
| 4 | 0.82 (0.69;0.98) | 0.96 (0.88;1.05) | 1.11 (1.01;1.21) | 0.95 (0.82;1.10) | 1.02 (0.96;1.08) | 1.09 (0.99;1.21) | 1.01 (0.91;1.13) | 1.17 (1.00;1.38) | 0.81 (0.51;1.29) | 1.03 (0.95;1.11) | 1.08 (0.99;1.19) | 0.97 (0.88;1.07) | 1.04 (0.86;1.26) |
| 5 | 0.88 (0.74;1.05) | 1.02 (0.93;1.11) | 1.01 (0.93;1.10) | 0.98 (0.85;1.13) | 0.99 (0.93;1.05) | 0.95 (0.87;1.03) | 0.95 (0.85;1.06) | 1.11 (0.93;1.32) | 0.80 (0.50;1.29) | 0.97 (0.90;1.05) | 1.04 (0.95;1.15) | 0.90 (0.81;0.99) | 1.08 (0.90;1.30) |
| 6 | 0.91 (0.76;1.08) | 0.93 (0.85;1.02) | 1.01 (0.93;1.11) | 1.01 (0.87;1.18) | 0.99 (0.93;1.05) | 0.97 (0.90;1.06) | 0.89 (0.80;1.00) | 1.14 (0.96;1.34) | 1.18 (0.78;1.78) | 0.98 (0.90;1.06) | 1.02 (0.93;1.13) | 0.88 (0.80;0.97) | 1.08 (0.89;1.32) |
| 7 (ref.) | 1.00 (ref.) | 1.00 (ref.) | 1.00 (ref.) | 1.00 (ref.) | 1.00 (ref.) | 1.00 (ref.) | 1.00 (ref.) | 1.00 (ref.) | 1.00 (ref.) | 1.00 (ref.) | 1.00 (ref.) | 1.00 (ref.) | 1.00 (ref.) |
| 8 | 1.17 (0.98;1.38) | 1.01 (0.93;1.10) | 1.04 (0.95;1.14) | 0.94 (0.82;1.08) | 1.01 (0.95;1.08) | 0.96 (0.88;1.05) | 0.94 (0.84;1.06) | 1.32 (1.10;1.58) | 0.77 (0.49;1.21) | 1.02 (0.94;1.11) | 1.04 (0.94;1.15) | 0.95 (0.86;1.04) | 1.05 (0.86;1.29) |
| 9 | 1.36 (1.15;1.61) | 1.02 (0.92;1.12) | 1.06 (0.96;1.15) | 1.04 (0.91;1.20) | 1.04 (0.97;1.11) | 1.07 (0.98;1.17) | 1.03 (0.92;1.15) | 1.21 (1.01;1.46) | 0.74 (0.47;1.17) | 1.07 (0.99;1.16) | 0.98 (0.88;1.08) | 0.93 (0.84;1.03) | 1.02 (0.84;1.25) |
| 10 | 1.48 (1.24;1.77) | 1.06 (0.97;1.17) | 1.11 (1.02;1.21) | 0.94 (0.81;1.09) | 1.07 (1.00;1.14) | 1.03 (0.94;1.14) | 1.05 (0.94;1.17) | 1.25 (1.05;1.49) | 0.79 (0.48;1.30) | 1.09 (1.00;1.18) | 1.06 (0.95;1.18) | 1.02 (0.92;1.13) | 1.15 (0.93;1.42) |
| m3 (adjusted as m2 + mental comorbidities) | | | | | | | | | | | | | |
| 1 | 0.39 (0.30;0.51) | 0.90 (0.81;1.00) | 1.02 (0.93;1.12) | 0.92 (0.80;1.07) | 0.98 (0.93;1.03) | 0.95 (0.87;1.04) | 1.39 (1.23;1.57) | 1.21 (1.00;1.48) | 1.13 (0.72;1.76) | 0.92 (0.84;1.01) | 1.01 (0.90;1.13) | 1.17 (1.06;1.30) | 0.97 (0.79;1.20) |
| 2 | 0.52 (0.42;0.64) | 0.97 (0.88;1.07) | 1.04 (0.96;1.12) | 1.00 (0.86;1.17) | 1.01 (0.96;1.07) | 1.05 (0.95;1.15) | 1.10 (0.99;1.24) | 1.09 (0.90;1.31) | 0.86 (0.53;1.40) | 0.93 (0.85;1.01) | 0.99 (0.88;1.10) | 0.99 (0.90;1.10) | 1.02 (0.83;1.26) |
| 3 | 0.71 (0.59;0.86) | 1.00 (0.91;1.09) | 1.01 (0.93;1.10) | 1.02 (0.88;1.18) | 1.02 (0.97;1.07) | 1.08 (0.99;1.19) | 1.08 (0.97;1.20) | 1.13 (0.96;1.34) | 0.90 (0.58;1.39) | 1.00 (0.91;1.09) | 1.04 (0.93;1.15) | 0.98 (0.88;1.10) | 1.00 (0.82;1.21) |
| 4 | 0.82 (0.69;0.98) | 0.96 (0.88;1.05) | 1.05 (0.97;1.13) | 0.95 (0.82;1.10) | 1.03 (0.98;1.09) | 1.06 (0.96;1.17) | 1.00 (0.90;1.12) | 1.18 (1.00;1.38) | 0.79 (0.49;1.26) | 1.03 (0.95;1.11) | 1.07 (0.97;1.18) | 0.97 (0.88;1.06) | 1.05 (0.87;1.27) |
| 5 | 0.88 (0.74;1.05) | 1.02 (0.93;1.11) | 1.02 (0.95;1.10) | 0.98 (0.85;1.14) | 0.99 (0.95;1.04) | 0.97 (0.89;1.05) | 0.96 (0.87;1.07) | 1.11 (0.94;1.32) | 0.81 (0.51;1.31) | 0.97 (0.90;1.05) | 1.04 (0.94;1.14) | 0.90 (0.81;0.99) | 1.09 (0.90;1.31) |
| 6 | 0.91 (0.77;1.08) | 0.93 (0.85;1.02) | 1.03 (0.96;1.11) | 1.03 (0.88;1.19) | 1.01 (0.96;1.06) | 0.99 (0.91;1.08) | 0.90 (0.81;1.01) | 1.14 (0.96;1.34) | 1.19 (0.78;1.80) | 0.98 (0.90;1.06) | 1.02 (0.92;1.13) | 0.88 (0.80;0.97) | 1.09 (0.89;1.32) |
| 7 (ref.) | 1.00 (ref.) | 1.00 (ref.) | 1.00 (ref.) | 1.00 (ref.) | 1.00 (ref.) | 1.00 (ref.) | 1.00 (ref.) | 1.00 (ref.) | 1.00 (ref.) | 1.00 (ref.) | 1.00 (ref.) | 1.00 (ref.) | 1.00 (ref.) |
| 8 | 1.17 (0.99;1.39) | 1.01 (0.93;1.10) | 1.04 (0.96;1.13) | 0.94 (0.82;1.09) | 1.03 (0.98;1.08) | 0.97 (0.89;1.06) | 0.95 (0.85;1.06) | 1.32 (1.11;1.58) | 0.78 (0.49;1.23) | 1.02 (0.94;1.11) | 1.03 (0.93;1.15) | 0.95 (0.86;1.05) | 1.06 (0.87;1.30) |
| 9 | 1.35 (1.15;1.60) | 1.01 (0.92;1.11) | 1.02 (0.94;1.11) | 1.03 (0.89;1.18) | 1.03 (0.98;1.08) | 1.04 (0.96;1.14) | 1.01 (0.91;1.13) | 1.22 (1.01;1.46) | 0.72 (0.46;1.14) | 1.07 (0.99;1.17) | 0.96 (0.86;1.06) | 0.93 (0.84;1.02) | 1.03 (0.85;1.26) |
| 10 | 1.46 (1.22;1.75) | 1.06 (0.96;1.16) | 1.06 (0.98;1.14) | 0.91 (0.79;1.06) | 1.04 (0.99;1.09) | 0.98 (0.90;1.08) | 1.02 (0.91;1.14) | 1.25 (1.05;1.49) | 0.76 (0.46;1.25) | 1.09 (1.01;1.19) | 1.03 (0.92;1.14) | 1.01 (0.91;1.13) | 1.15 (0.93;1.42) |

**Supplementary Table 2: IRRs of treatment regimens by decile groups of the observed over expected ratio – younger than 75**

| OE group | Talk therapy | Psychologist | Psychiatric hospital | Psychiatrist | Antidepressants | Antipsychotics | Anxiolytics | Suicide | First-time  antidepressants | First-time  antipsychotics | First-time  anxiolytics |
| --- | --- | --- | --- | --- | --- | --- | --- | --- | --- | --- | --- |
| m0 (unadjusted) | | | | | | | | | | | |
| 1 | 0.36 (0.27;0.47) | 0.86 (0.76;0.96) | 1.03 (0.92;1.15) | 0.93 (0.80;1.08) | 0.96 (0.88;1.05) | 0.98 (0.86;1.12) | 1.50 (1.29;1.76) | 0.92 (0.55;1.54) | 1.00 (0.91;1.11) | 1.16 (0.99;1.35) | 1.23 (1.08;1.39) |
| 2 | 0.55 (0.45;0.69) | 0.98 (0.88;1.09) | 1.02 (0.92;1.14) | 0.98 (0.83;1.16) | 1.00 (0.92;1.08) | 1.08 (0.96;1.22) | 1.09 (0.95;1.25) | 0.92 (0.56;1.51) | 0.97 (0.89;1.06) | 1.00 (0.87;1.15) | 1.11 (0.98;1.26) |
| 3 | 0.66 (0.54;0.80) | 0.97 (0.88;1.07) | 0.95 (0.85;1.05) | 1.06 (0.91;1.24) | 1.05 (0.97;1.13) | 1.11 (0.99;1.25) | 1.16 (1.01;1.32) | 0.76 (0.45;1.25) | 1.02 (0.93;1.11) | 1.14 (1.01;1.30) | 1.06 (0.93;1.19) |
| 4 | 0.81 (0.69;0.97) | 0.99 (0.90;1.10) | 1.05 (0.93;1.17) | 0.98 (0.85;1.14) | 1.01 (0.94;1.09) | 1.15 (1.01;1.31) | 1.03 (0.91;1.16) | 0.79 (0.47;1.32) | 1.01 (0.93;1.09) | 1.07 (0.94;1.22) | 1.02 (0.91;1.14) |
| 5 | 0.81 (0.68;0.97) | 1.04 (0.94;1.15) | 0.95 (0.85;1.05) | 1.02 (0.87;1.19) | 0.99 (0.92;1.06) | 0.99 (0.88;1.12) | 1.03 (0.91;1.16) | 0.79 (0.49;1.28) | 0.99 (0.92;1.07) | 1.06 (0.93;1.21) | 1.04 (0.92;1.16) |
| 6 | 0.79 (0.67;0.94) | 1.02 (0.93;1.13) | 0.88 (0.80;0.98) | 0.99 (0.84;1.16) | 1.00 (0.93;1.08) | 0.97 (0.87;1.08) | 0.91 (0.80;1.03) | 0.53 (0.31;0.91) | 1.00 (0.93;1.09) | 1.02 (0.89;1.16) | 0.88 (0.79;0.98) |
| 7 (ref.) | 1.00 (ref.) | 1.00 (ref.) | 1.00 (ref.) | 1.00 (ref.) | 1.00 (ref.) | 1.00 (ref.) | 1.00 (ref.) | 1.00 (ref.) | 1.00 (ref.) | 1.00 (ref.) | 1.00 (ref.) |
| 8 | 1.12 (0.95;1.32) | 1.06 (0.97;1.17) | 0.91 (0.82;1.01) | 0.95 (0.82;1.11) | 1.01 (0.93;1.10) | 1.00 (0.90;1.13) | 0.95 (0.83;1.09) | 0.95 (0.60;1.49) | 1.00 (0.92;1.09) | 1.07 (0.94;1.21) | 1.01 (0.90;1.13) |
| 9 | 1.33 (1.12;1.57) | 1.07 (0.96;1.18) | 1.00 (0.90;1.11) | 1.11 (0.96;1.29) | 1.01 (0.94;1.10) | 1.00 (0.89;1.13) | 1.07 (0.94;1.21) | 0.92 (0.57;1.50) | 1.10 (1.01;1.18) | 1.06 (0.92;1.22) | 1.02 (0.90;1.15) |
| 10 | 1.38 (1.14;1.66) | 1.12 (1.00;1.25) | 1.07 (0.97;1.19) | 0.95 (0.81;1.11) | 1.06 (0.97;1.15) | 1.09 (0.97;1.23) | 1.05 (0.91;1.21) | 0.77 (0.47;1.26) | 1.16 (1.07;1.26) | 1.12 (0.98;1.28) | 1.01 (0.89;1.14) |
| m1 (adjusted for age, sex, and calendar time) | | | | | | | | | | | |
| 1 | 0.37 (0.28;0.49) | 0.89 (0.80;1.00) | 1.04 (0.93;1.15) | 0.95 (0.82;1.11) | 0.98 (0.90;1.06) | 0.98 (0.87;1.12) | 1.50 (1.29;1.75) | 0.89 (0.54;1.49) | 1.01 (0.92;1.12) | 1.15 (0.99;1.35) | 1.25 (1.10;1.41) |
| 2 | 0.56 (0.45;0.70) | 1.01 (0.91;1.11) | 1.04 (0.94;1.14) | 0.99 (0.84;1.17) | 0.99 (0.91;1.06) | 1.07 (0.95;1.21) | 1.06 (0.92;1.22) | 0.90 (0.55;1.48) | 0.97 (0.89;1.06) | 1.00 (0.87;1.16) | 1.11 (0.98;1.26) |
| 3 | 0.67 (0.55;0.81) | 1.01 (0.92;1.10) | 0.96 (0.87;1.07) | 1.08 (0.93;1.25) | 1.03 (0.96;1.11) | 1.10 (0.98;1.24) | 1.13 (0.99;1.28) | 0.74 (0.45;1.23) | 1.02 (0.94;1.12) | 1.15 (1.02;1.30) | 1.05 (0.93;1.19) |
| 4 | 0.82 (0.70;0.98) | 1.02 (0.93;1.11) | 1.06 (0.95;1.18) | 0.99 (0.86;1.14) | 1.01 (0.94;1.09) | 1.15 (1.01;1.30) | 1.02 (0.90;1.14) | 0.78 (0.47;1.30) | 1.01 (0.94;1.10) | 1.07 (0.94;1.22) | 1.02 (0.91;1.14) |
| 5 | 0.82 (0.70;0.98) | 1.06 (0.96;1.16) | 0.95 (0.86;1.05) | 1.03 (0.88;1.20) | 0.99 (0.93;1.06) | 0.99 (0.88;1.11) | 1.02 (0.91;1.16) | 0.78 (0.48;1.26) | 1.00 (0.92;1.08) | 1.06 (0.93;1.21) | 1.04 (0.93;1.17) |
| 6 | 0.80 (0.68;0.94) | 1.04 (0.96;1.13) | 0.89 (0.81;0.98) | 0.99 (0.85;1.16) | 1.00 (0.93;1.07) | 0.97 (0.87;1.08) | 0.91 (0.80;1.03) | 0.52 (0.30;0.90) | 1.01 (0.93;1.09) | 1.02 (0.89;1.16) | 0.88 (0.79;0.99) |
| 7 (ref.) | 1.00 (ref.) | 1.00 (ref.) | 1.00 (ref.) | 1.00 (ref.) | 1.00 (ref.) | 1.00 (ref.) | 1.00 (ref.) | 1.00 (ref.) | 1.00 (ref.) | 1.00 (ref.) | 1.00 (ref.) |
| 8 | 1.12 (0.96;1.31) | 1.04 (0.95;1.14) | 0.89 (0.81;0.98) | 0.95 (0.82;1.09) | 1.03 (0.96;1.11) | 1.02 (0.91;1.14) | 0.98 (0.86;1.12) | 0.95 (0.60;1.50) | 1.00 (0.91;1.08) | 1.06 (0.94;1.20) | 1.02 (0.91;1.14) |
| 9 | 1.33 (1.13;1.56) | 1.06 (0.96;1.16) | 0.99 (0.90;1.09) | 1.11 (0.96;1.28) | 1.03 (0.95;1.10) | 1.01 (0.90;1.14) | 1.09 (0.96;1.23) | 0.92 (0.57;1.50) | 1.09 (1.01;1.18) | 1.06 (0.92;1.22) | 1.03 (0.91;1.16) |
| 10 | 1.38 (1.15;1.66) | 1.09 (0.99;1.21) | 1.04 (0.95;1.15) | 0.94 (0.81;1.10) | 1.10 (1.02;1.18) | 1.12 (0.99;1.26) | 1.11 (0.96;1.28) | 0.78 (0.47;1.27) | 1.16 (1.07;1.26) | 1.10 (0.96;1.26) | 1.03 (0.91;1.17) |
| m2 (adjusted as m1 + immigration status, cohabitation status, educational level, income, and somatic comorbidities) | | | | | | | | | | | |
| 1 | 0.37 (0.28;0.48) | 0.91 (0.82;1.01) | 0.95 (0.86;1.05) | 0.91 (0.78;1.05) | 0.93 (0.87;0.99) | 0.89 (0.80;0.99) | 1.39 (1.21;1.60) | 0.84 (0.50;1.39) | 0.96 (0.87;1.05) | 1.08 (0.93;1.25) | 1.21 (1.07;1.37) |
| 2 | 0.56 (0.45;0.70) | 1.02 (0.93;1.12) | 1.01 (0.92;1.11) | 0.98 (0.83;1.15) | 0.97 (0.92;1.03) | 1.04 (0.94;1.14) | 1.03 (0.92;1.16) | 0.88 (0.53;1.44) | 0.95 (0.88;1.04) | 0.98 (0.86;1.13) | 1.10 (0.97;1.24) |
| 3 | 0.66 (0.54;0.80) | 1.00 (0.92;1.10) | 0.93 (0.84;1.02) | 1.05 (0.90;1.23) | 0.99 (0.94;1.05) | 1.04 (0.95;1.14) | 1.07 (0.95;1.19) | 0.71 (0.43;1.19) | 1.00 (0.92;1.09) | 1.12 (0.99;1.25) | 1.03 (0.92;1.16) |
| 4 | 0.82 (0.70;0.98) | 1.02 (0.93;1.11) | 1.06 (0.96;1.18) | 1.00 (0.87;1.15) | 1.01 (0.95;1.08) | 1.15 (1.04;1.28) | 1.02 (0.92;1.13) | 0.78 (0.47;1.30) | 1.02 (0.94;1.10) | 1.09 (0.96;1.23) | 1.02 (0.91;1.14) |
| 5 | 0.82 (0.69;0.97) | 1.04 (0.95;1.14) | 0.95 (0.87;1.04) | 1.02 (0.88;1.19) | 0.98 (0.93;1.03) | 0.98 (0.89;1.08) | 1.01 (0.91;1.12) | 0.77 (0.47;1.24) | 1.00 (0.92;1.07) | 1.06 (0.94;1.20) | 1.03 (0.92;1.16) |
| 6 | 0.80 (0.67;0.94) | 1.03 (0.95;1.12) | 0.90 (0.82;0.99) | 1.00 (0.85;1.17) | 1.00 (0.94;1.06) | 0.98 (0.90;1.07) | 0.91 (0.81;1.02) | 0.52 (0.30;0.89) | 1.01 (0.93;1.09) | 1.02 (0.91;1.15) | 0.88 (0.79;0.98) |
| 7 (ref.) | 1.00 (ref.) | 1.00 (ref.) | 1.00 (ref.) | 1.00 (ref.) | 1.00 (ref.) | 1.00 (ref.) | 1.00 (ref.) | 1.00 (ref.) | 1.00 (ref.) | 1.00 (ref.) | 1.00 (ref.) |
| 8 | 1.11 (0.95;1.30) | 1.02 (0.94;1.12) | 0.91 (0.83;1.00) | 0.94 (0.82;1.09) | 1.03 (0.97;1.09) | 1.03 (0.94;1.13) | 0.99 (0.88;1.11) | 0.95 (0.60;1.50) | 1.00 (0.92;1.08) | 1.07 (0.95;1.20) | 1.02 (0.91;1.14) |
| 9 | 1.32 (1.13;1.56) | 1.05 (0.95;1.15) | 0.99 (0.90;1.09) | 1.10 (0.95;1.27) | 1.02 (0.97;1.09) | 1.01 (0.92;1.11) | 1.08 (0.96;1.21) | 0.91 (0.56;1.48) | 1.10 (1.02;1.18) | 1.06 (0.93;1.21) | 1.03 (0.91;1.16) |
| 10 | 1.36 (1.14;1.64) | 1.07 (0.98;1.18) | 1.01 (0.92;1.11) | 0.91 (0.78;1.06) | 1.08 (1.01;1.15) | 1.08 (0.98;1.19) | 1.08 (0.94;1.23) | 0.74 (0.45;1.22) | 1.15 (1.06;1.25) | 1.08 (0.95;1.23) | 1.02 (0.90;1.15) |
| m3 (adjusted as m2 + mental comorbidities) | | | | | | | | | | | |
| 1 | 0.37 (0.28;0.49) | 0.93 (0.84;1.03) | 0.96 (0.88;1.04) | 0.95 (0.82;1.10) | 0.98 (0.93;1.03) | 0.89 (0.80;0.99) | 1.41 (1.23;1.62) | 0.82 (0.49;1.35) | 0.95 (0.86;1.05) | 1.11 (0.96;1.28) | 1.22 (1.08;1.38) |
| 2 | 0.57 (0.46;0.70) | 1.02 (0.93;1.13) | 0.99 (0.91;1.07) | 0.99 (0.84;1.17) | 1.00 (0.95;1.04) | 1.05 (0.96;1.15) | 1.04 (0.93;1.17) | 0.86 (0.52;1.42) | 0.95 (0.87;1.03) | 1.00 (0.87;1.15) | 1.10 (0.97;1.25) |
| 3 | 0.66 (0.54;0.79) | 1.00 (0.92;1.09) | 0.93 (0.86;1.01) | 1.05 (0.90;1.22) | 0.98 (0.94;1.02) | 1.02 (0.93;1.13) | 1.06 (0.95;1.18) | 0.71 (0.43;1.18) | 1.00 (0.92;1.09) | 1.13 (1.01;1.27) | 1.03 (0.91;1.16) |
| 4 | 0.83 (0.70;0.98) | 1.02 (0.94;1.11) | 1.02 (0.93;1.11) | 1.00 (0.87;1.15) | 1.02 (0.97;1.07) | 1.11 (1.01;1.23) | 1.01 (0.91;1.12) | 0.76 (0.46;1.28) | 1.02 (0.94;1.10) | 1.09 (0.96;1.23) | 1.02 (0.91;1.14) |
| 5 | 0.82 (0.70;0.98) | 1.05 (0.96;1.15) | 0.96 (0.88;1.03) | 1.03 (0.89;1.21) | 0.99 (0.95;1.03) | 0.97 (0.88;1.07) | 1.02 (0.91;1.13) | 0.75 (0.46;1.23) | 1.00 (0.92;1.08) | 1.07 (0.94;1.21) | 1.03 (0.92;1.16) |
| 6 | 0.80 (0.67;0.94) | 1.03 (0.95;1.12) | 0.93 (0.86;1.01) | 1.00 (0.85;1.18) | 1.00 (0.95;1.04) | 1.01 (0.93;1.11) | 0.93 (0.83;1.04) | 0.52 (0.30;0.89) | 1.01 (0.93;1.10) | 1.03 (0.91;1.16) | 0.88 (0.79;0.98) |
| 7 (ref.) | 1.00 (ref.) | 1.00 (ref.) | 1.00 (ref.) | 1.00 (ref.) | 1.00 (ref.) | 1.00 (ref.) | 1.00 (ref.) | 1.00 (ref.) | 1.00 (ref.) | 1.00 (ref.) | 1.00 (ref.) |
| 8 | 1.11 (0.95;1.30) | 1.03 (0.94;1.12) | 0.91 (0.84;0.99) | 0.94 (0.81;1.08) | 1.02 (0.98;1.06) | 1.01 (0.92;1.11) | 0.98 (0.88;1.10) | 0.95 (0.60;1.49) | 1.00 (0.92;1.09) | 1.08 (0.96;1.21) | 1.02 (0.92;1.14) |
| 9 | 1.31 (1.12;1.54) | 1.04 (0.95;1.14) | 0.97 (0.89;1.05) | 1.07 (0.93;1.25) | 1.00 (0.96;1.05) | 0.99 (0.90;1.09) | 1.08 (0.96;1.21) | 0.89 (0.55;1.44) | 1.10 (1.01;1.19) | 1.06 (0.92;1.21) | 1.03 (0.91;1.16) |
| 10 | 1.35 (1.13;1.62) | 1.07 (0.97;1.18) | 0.97 (0.90;1.05) | 0.88 (0.76;1.03) | 1.04 (0.99;1.09) | 1.04 (0.95;1.14) | 1.06 (0.93;1.21) | 0.72 (0.44;1.18) | 1.15 (1.06;1.25) | 1.06 (0.93;1.21) | 1.01 (0.89;1.14) |

**Supplementary Table 3: Population characteristics across OE groups and train/test set**

| **OE group** | **1** | **1** | **2** | **2** | **3** | **3** | **4** | **4** | **5** | **5** | **6** | **6** | **7** | **7** | **8** | **8** | **9** | **9** | **10** | **10** |
| --- | --- | --- | --- | --- | --- | --- | --- | --- | --- | --- | --- | --- | --- | --- | --- | --- | --- | --- | --- | --- |
| **Train/test** | **Test** | **Train** | **Test** | **Train** | **Test** | **Train** | **Test** | **Train** | **Test** | **Train** | **Test** | **Train** | **Test** | **Train** | **Test** | **Train** | **Test** | **Train** | **Test** | **Train** |
| **Gender** |  |  |  |  |  |  |  |  |  |  |  |  |  |  |  |  |  |  |  |  |
| Men | 51.2% | 50.9% | 48.5% | 48.7% | 49.2% | 49.2% | 48.8% | 48.8% | 49.7% | 49.7% | 48.7% | 48.8% | 48.5% | 48.7% | 48.3% | 48.4% | 48.7% | 49% | 49.8% | 49.7% |
| Women | 48.8% | 49.1% | 51.5% | 51.3% | 50.8% | 50.8% | 51.2% | 51.2% | 50.3% | 50.3% | 51.3% | 51.2% | 51.5% | 51.3% | 51.7% | 51.6% | 51.3% | 51% | 50.2% | 50.3% |
| **Age,** years |  |  |  |  |  |  |  |  |  |  |  |  |  |  |  |  |  |  |  |  |
| 18-24 | 10.5% | 10.4% | 10.2% | 10.2% | 10.1% | 9.9% | 9.9% | 9.9% | 9.8% | 9.9% | 10.8% | 10.7% | 10.7% | 10.7% | 10.2% | 10.3% | 11.3% | 11.4% | 12.1% | 11.9% |
| 25-34 | 15.7% | 15.6% | 14.6% | 14.5% | 14.3% | 14.1% | 14.5% | 14.4% | 14.8% | 14.7% | 15.5% | 15.6% | 15.9% | 15.8% | 15.2% | 15.2% | 17% | 17% | 18.3% | 18.2% |
| 35-44 | 14.7% | 14.9% | 15.5% | 15.5% | 15.5% | 15.4% | 16% | 16.1% | 15.7% | 15.8% | 15.7% | 15.8% | 15.7% | 15.8% | 16.3% | 16.4% | 16.3% | 16.2% | 15.8% | 15.9% |
| 45-54 | 17.6% | 17.7% | 18.1% | 18.2% | 18% | 18.1% | 18.5% | 18.5% | 18.4% | 18.4% | 17.9% | 17.8% | 18.3% | 18.1% | 18.5% | 18.5% | 17.3% | 17.2% | 17% | 17.1% |
| 55-64 | 15.9% | 15.9% | 15.9% | 15.9% | 16.5% | 16.5% | 15.7% | 15.6% | 16.1% | 16% | 15.7% | 15.7% | 15.7% | 15.7% | 15.6% | 15.5% | 14.8% | 15% | 14.8% | 14.8% |
| 65-74 | 14.8% | 14.6% | 14.8% | 14.7% | 14.8% | 15.1% | 14.9% | 14.9% | 14.5% | 14.6% | 14.1% | 14.1% | 13.9% | 13.9% | 14.2% | 14.1% | 13.7% | 13.7% | 12.9% | 13.1% |
| 75-84 | 8.1% | 8% | 8.2% | 8.2% | 8.1% | 8.2% | 7.9% | 8% | 8% | 7.9% | 7.6% | 7.5% | 7.3% | 7.3% | 7.5% | 7.4% | 7.2% | 7.1% | 6.7% | 6.7% |
| 85- | 2.8% | 2.8% | 2.7% | 2.8% | 2.8% | 2.8% | 2.7% | 2.6% | 2.7% | 2.7% | 2.6% | 2.7% | 2.6% | 2.6% | 2.6% | 2.5% | 2.5% | 2.4% | 2.4% | 2.3% |
| **Season** |  |  |  |  |  |  |  |  |  |  |  |  |  |  |  |  |  |  |  |  |
| Winter | 24.6% | 24.6% | 24.6% | 24.6% | 24.5% | 24.5% | 24.6% | 24.6% | 24.6% | 24.6% | 24.6% | 24.6% | 24.6% | 24.6% | 24.6% | 24.6% | 24.5% | 24.5% | 24.5% | 24.5% |
| Spring | 25.2% | 25.2% | 25.3% | 25.3% | 25.3% | 25.3% | 25.3% | 25.3% | 25.3% | 25.3% | 25.3% | 25.3% | 25.3% | 25.3% | 25.2% | 25.2% | 25.2% | 25.2% | 25.3% | 25.3% |
| Summer | 25.3% | 25.3% | 25.2% | 25.2% | 25.2% | 25.2% | 25.2% | 25.2% | 25.2% | 25.2% | 25.2% | 25.2% | 25.2% | 25.2% | 25.2% | 25.2% | 25.3% | 25.3% | 25.3% | 25.2% |
| Fall | 24.9% | 24.9% | 24.8% | 24.9% | 24.9% | 24.9% | 24.9% | 24.9% | 24.9% | 24.9% | 24.9% | 24.9% | 24.9% | 24.9% | 25% | 25% | 25% | 25% | 24.9% | 24.9% |
| **Year** |  |  |  |  |  |  |  |  |  |  |  |  |  |  |  |  |  |  |  |  |
| 2017 | 49.3% | 49.4% | 49.8% | 49.8% | 49.6% | 49.6% | 49.8% | 49.8% | 49.7% | 49.7% | 49.8% | 49.8% | 49.6% | 49.6% | 49.4% | 49.5% | 49.6% | 49.5% | 49.4% | 49.4% |
| 2018 | 50.7% | 50.6% | 50.2% | 50.2% | 50.4% | 50.4% | 50.2% | 50.2% | 50.3% | 50.3% | 50.2% | 50.2% | 50.4% | 50.4% | 50.6% | 50.5% | 50.4% | 50.5% | 50.6% | 50.6% |
| **Immigration status** |  |  |  |  |  |  |  |  |  |  |  |  |  |  |  |  |  |  |  |  |
| Danish | 84.9% | 85% | 87.2% | 87.4% | 87.7% | 87.7% | 88.6% | 88.7% | 88.5% | 88.5% | 88.3% | 88.1% | 87.9% | 87.9% | 88.1% | 88.1% | 86.4% | 86.4% | 85.8% | 85.9% |
| Western immigrant | 5.3% | 5.3% | 4.6% | 4.5% | 4.3% | 4.4% | 4.5% | 4.4% | 4.5% | 4.6% | 4.8% | 4.9% | 4.4% | 4.5% | 4.7% | 4.7% | 5.2% | 5.2% | 5.5% | 5.4% |
| Non-western immigrant | 9.8% | 9.6% | 8.2% | 8.1% | 8% | 7.9% | 6.9% | 6.9% | 7% | 7% | 6.9% | 7% | 7.6% | 7.6% | 7.2% | 7.2% | 8.4% | 8.5% | 8.7% | 8.7% |
| **Educational level,** years |  |  |  |  |  |  |  |  |  |  |  |  |  |  |  |  |  |  |  |  |
| -10 | 27.9% | 27.9% | 26.3% | 26.4% | 26.1% | 26% | 25% | 24.9% | 25.8% | 25.6% | 25.1% | 25.1% | 24.4% | 24.4% | 24.1% | 24.1% | 23.5% | 23.3% | 23.5% | 23.3% |
| 11-15 | 45.7% | 45.8% | 47% | 47.4% | 46.8% | 46.8% | 47.3% | 47.1% | 47% | 47.1% | 46.8% | 46.6% | 46.1% | 46.2% | 46.9% | 46.7% | 45.8% | 46.3% | 45.9% | 46% |
| 16- | 21.8% | 21.9% | 23.1% | 22.6% | 23.6% | 23.7% | 24.4% | 24.6% | 23.9% | 23.9% | 24.6% | 24.9% | 26.1% | 25.9% | 25.6% | 25.7% | 26.9% | 26.7% | 26.6% | 26.6% |
| **Family income category** |  |  |  |  |  |  |  |  |  |  |  |  |  |  |  |  |  |  |  |  |
| No education registered | 4.6% | 4.4% | 3.6% | 3.6% | 3.5% | 3.5% | 3.4% | 3.3% | 3.3% | 3.4% | 3.4% | 3.4% | 3.4% | 3.5% | 3.4% | 3.4% | 3.7% | 3.7% | 4% | 4% |
| 1st quintile in that year | 17.1% | 17.1% | 14.8% | 14.7% | 14.5% | 14.5% | 13.5% | 13.4% | 13.6% | 13.7% | 14.9% | 14.8% | 15% | 15.1% | 14% | 14.1% | 16% | 16.1% | 17.5% | 17.5% |
| 2nd quintile in that year | 19.2% | 19.2% | 17.8% | 17.9% | 18% | 18% | 17% | 17.1% | 17.5% | 17.4% | 17.5% | 17.4% | 16.9% | 16.7% | 16.8% | 16.5% | 16.7% | 16.7% | 17% | 17.1% |
| 3rd quintile in that year | 20.1% | 19.9% | 20.4% | 20.7% | 20.3% | 20.1% | 20.4% | 20.2% | 20.4% | 20.7% | 20% | 20% | 19.6% | 19.7% | 19.7% | 19.8% | 19.4% | 19.4% | 19.4% | 19.2% |
| 4th quintile in that year | 21.2% | 21.4% | 23.4% | 23.3% | 22.7% | 22.6% | 23.9% | 23.8% | 23.8% | 23.5% | 22.8% | 22.7% | 22.8% | 22.9% | 23.3% | 23.3% | 22.4% | 22.5% | 22.1% | 21.9% |
| 5th quintile in that year | 21.7% | 21.7% | 23% | 22.9% | 24% | 24.3% | 24.8% | 25.1% | 24.2% | 24.2% | 24.4% | 24.5% | 25.3% | 25.1% | 25.8% | 25.8% | 25% | 24.7% | 23.4% | 23.7% |
| Negative or no income in that year | .7% | .7% | .6% | .5% | .5% | .5% | .4% | .4% | .5% | .4% | .4% | .5% | .5% | .5% | .5% | .5% | .6% | .5% | .6% | .6% |
| **Cohabitation status** |  |  |  |  |  |  |  |  |  |  |  |  |  |  |  |  |  |  |  |  |
| Single | 40% | 40.1% | 38.1% | 38.1% | 37.5% | 37.3% | 36.5% | 36.6% | 36.6% | 36.6% | 37.6% | 37.3% | 37.4% | 37.2% | 36.9% | 36.9% | 38.8% | 39% | 40% | 39.8% |
| Married | 45.5% | 45.5% | 47.7% | 47.7% | 47.8% | 48.2% | 48.8% | 48.9% | 48.6% | 48.6% | 47.1% | 47.4% | 47.2% | 47.3% | 48% | 48% | 45.5% | 45.3% | 43.7% | 43.9% |
| Cohabiting | 14.4% | 14.4% | 14.2% | 14.3% | 14.7% | 14.5% | 14.7% | 14.5% | 14.7% | 14.8% | 15.2% | 15.3% | 15.4% | 15.5% | 15.1% | 15% | 15.7% | 15.8% | 16.3% | 16.3% |
| **Comorbidity** |  |  |  |  |  |  |  |  |  |  |  |  |  |  |  |  |  |  |  |  |
| Atrial fibrillation | 2.9% | 2.9% | 3.1% | 3.1% | 3.1% | 3.1% | 3% | 3% | 3% | 3% | 2.9% | 2.9% | 2.8% | 2.9% | 2.9% | 2.9% | 2.8% | 2.8% | 2.6% | 2.6% |
| Alcohol problems | 1.4% | 1.4% | 1.3% | 1.3% | 1.3% | 1.3% | 1.2% | 1.2% | 1.2% | 1.2% | 1.2% | 1.2% | 1.2% | 1.2% | 1.1% | 1.2% | 1.2% | 1.2% | 1.2% | 1.2% |
| Allergy | 12.3% | 12.4% | 12.7% | 12.6% | 12.9% | 12.9% | 12.7% | 12.7% | 12.9% | 12.9% | 12.6% | 12.6% | 12.8% | 12.8% | 13% | 13% | 12.8% | 12.9% | 12.9% | 13% |
| Anemias | 1.7% | 1.7% | 1.7% | 1.8% | 1.8% | 1.7% | 1.7% | 1.7% | 1.7% | 1.7% | 1.7% | 1.7% | 1.7% | 1.7% | 1.7% | 1.7% | 1.7% | 1.7% | 1.6% | 1.7% |
| Bipolar affective disorder | .6% | .6% | .6% | .6% | .7% | .6% | .6% | .7% | .6% | .6% | .6% | .6% | .6% | .6% | .7% | .6% | .7% | .7% | .7% | .7% |
| Hypertension | 23.5% | 23.4% | 23.3% | 23.2% | 23.5% | 23.6% | 23.1% | 23.2% | 23.1% | 23.3% | 22.2% | 22.4% | 21.9% | 22% | 22.3% | 22.3% | 21.3% | 21.3% | 20.7% | 20.6% |
| Cancers | 6.1% | 6% | 6.1% | 6.2% | 6.2% | 6.3% | 6.2% | 6.2% | 6.1% | 6.1% | 5.9% | 5.9% | 6% | 5.9% | 6% | 6% | 5.6% | 5.7% | 5.5% | 5.5% |
| Dementia | .8% | .8% | .8% | .9% | .9% | .9% | .9% | .8% | .8% | .9% | .8% | .8% | .8% | .8% | .8% | .8% | .8% | .8% | .8% | .8% |
| Diverticular disease of intestine | 2% | 2% | 2.2% | 2.1% | 2.2% | 2.2% | 2.2% | 2.1% | 2.2% | 2.2% | 2% | 2.1% | 2.1% | 2% | 2% | 2% | 1.9% | 1.9% | 1.8% | 1.8% |
| Diabetes mellitus | 6.2% | 6.2% | 6.2% | 6.2% | 6.1% | 6.2% | 5.8% | 5.8% | 5.9% | 6% | 5.8% | 5.9% | 5.6% | 5.7% | 5.8% | 5.7% | 5.6% | 5.6% | 5.5% | 5.5% |
| Substance abuse | .6% | .6% | .5% | .5% | .5% | .5% | .5% | .4% | .4% | .4% | .4% | .4% | .4% | .4% | .4% | .4% | .5% | .5% | .5% | .5% |
| Mood, stress-related, or anxiety disorders | 5.3% | 5.3% | 5.3% | 5.3% | 5.4% | 5.3% | 5.1% | 5.2% | 5.2% | 5.2% | 5.2% | 5.2% | 5.2% | 5.3% | 5.1% | 5.1% | 5.3% | 5.3% | 5.4% | 5.4% |
| Epilepsy | 1.4% | 1.4% | 1.5% | 1.4% | 1.5% | 1.5% | 1.4% | 1.4% | 1.4% | 1.4% | 1.4% | 1.4% | 1.4% | 1.4% | 1.4% | 1.4% | 1.3% | 1.4% | 1.4% | 1.4% |
| Gout | 1.9% | 1.9% | 1.8% | 1.7% | 1.7% | 1.8% | 1.7% | 1.7% | 1.7% | 1.7% | 1.7% | 1.7% | 1.5% | 1.6% | 1.7% | 1.6% | 1.6% | 1.6% | 1.6% | 1.5% |
| HIV/AIDS | .1% | .1% | .1% | .1% | .1% | .1% | .1% | .1% | .1% | .1% | .1% | .1% | .1% | .1% | .1% | .1% | .1% | .1% | .1% | .1% |
| Hearing problem | 5.2% | 5.2% | 5.2% | 5.2% | 5.2% | 5.3% | 5.2% | 5.2% | 5.4% | 5.6% | 5.2% | 5.2% | 5.1% | 5.2% | 5.1% | 5.2% | 4.9% | 5% | 4.9% | 4.8% |
| Heart failure | 1.2% | 1.2% | 1.2% | 1.2% | 1.2% | 1.2% | 1.1% | 1.1% | 1.2% | 1.2% | 1.1% | 1.1% | 1% | 1% | 1.1% | 1.1% | 1.1% | 1.1% | 1% | 1% |
| Inflammatory bowel disease | 1.2% | 1.2% | 1.3% | 1.3% | 1.3% | 1.3% | 1.3% | 1.3% | 1.3% | 1.3% | 1.3% | 1.3% | 1.2% | 1.3% | 1.3% | 1.3% | 1.2% | 1.2% | 1.3% | 1.3% |
| Ischemic heart disease | 5.6% | 5.7% | 5.8% | 5.8% | 5.8% | 5.8% | 5.7% | 5.7% | 5.7% | 5.7% | 5.6% | 5.5% | 5.4% | 5.4% | 5.5% | 5.4% | 5.3% | 5.4% | 5% | 4.9% |
| Chronic liver disease | 1% | 1% | .9% | .9% | .9% | .9% | .8% | .9% | .8% | .9% | .8% | .8% | .8% | .9% | .8% | .8% | .9% | .9% | .9% | 1% |
| Dyslipidemia | 12.3% | 12.3% | 12.3% | 12.3% | 12.6% | 12.8% | 12.3% | 12.3% | 12.2% | 12.3% | 12.1% | 12.2% | 11.8% | 11.8% | 12% | 12% | 11.8% | 11.8% | 11.8% | 11.7% |
| Chronic pulmonary disease | 11.8% | 12.1% | 12% | 12% | 12.2% | 12.2% | 12.1% | 12% | 12.3% | 12.3% | 12% | 12% | 11.9% | 11.9% | 12.1% | 12% | 12% | 12.1% | 12% | 12% |
| Migraine | 3.6% | 3.7% | 3.8% | 3.7% | 3.7% | 3.8% | 3.8% | 3.8% | 3.7% | 3.8% | 3.7% | 3.7% | 3.7% | 3.7% | 3.8% | 3.8% | 3.7% | 3.7% | 3.6% | 3.6% |
| Neuropathies | 3.3% | 3.3% | 3.5% | 3.5% | 3.5% | 3.7% | 3.5% | 3.5% | 3.7% | 3.6% | 3.5% | 3.5% | 3.3% | 3.4% | 3.4% | 3.4% | 3.3% | 3.4% | 3.1% | 3.1% |
| Chronic kidney disease | .7% | .7% | .8% | .8% | .8% | .8% | .8% | .8% | .8% | .8% | .7% | .8% | .7% | .8% | .8% | .8% | .7% | .7% | .8% | .7% |
| Osteoporosis | 3.7% | 3.6% | 3.6% | 3.7% | 3.9% | 3.9% | 4% | 4% | 3.8% | 3.9% | 3.7% | 3.9% | 3.8% | 3.7% | 3.8% | 3.7% | 3.7% | 3.8% | 3.6% | 3.5% |
| Peripheral artery occlusive disease | 2% | 2% | 2.1% | 2.1% | 2.1% | 2.2% | 2.1% | 2.1% | 2.1% | 2.1% | 2.1% | 2% | 1.9% | 2% | 1.9% | 1.9% | 1.9% | 1.8% | 1.9% | 1.8% |
| Painful condition | 19.9% | 20% | 19.8% | 19.7% | 20% | 20.1% | 19.5% | 19.3% | 19.6% | 19.5% | 18.7% | 18.8% | 18.5% | 18.7% | 18.9% | 18.8% | 17.9% | 17.8% | 17.7% | 17.7% |
| Parkinson's disease | .2% | .2% | .2% | .2% | .2% | .2% | .2% | .2% | .2% | .2% | .2% | .2% | .2% | .2% | .2% | .2% | .2% | .2% | .2% | .2% |
| Prostate disorders | 3.3% | 3.3% | 3.3% | 3.3% | 3.5% | 3.5% | 3.4% | 3.4% | 3.4% | 3.4% | 3.2% | 3.3% | 3.1% | 3.2% | 3.2% | 3.2% | 3.1% | 3.1% | 3% | 3% |
| Psychological distress | 12.9% | 12.9% | 13.2% | 13.1% | 13.7% | 13.7% | 13.1% | 13.1% | 13.3% | 13.4% | 13% | 13.2% | 13.1% | 13.2% | 13.1% | 13.2% | 13.2% | 13.4% | 13.4% | 13.3% |
| Connective tissue disorders | 2.1% | 2.1% | 2.2% | 2.3% | 2.2% | 2.2% | 2.1% | 2.1% | 2.2% | 2.2% | 2.2% | 2.2% | 2.1% | 2.1% | 2.1% | 2.2% | 2.1% | 2.1% | 2% | 2% |
| Schizophrenia or schizoaffective disorder | .9% | .9% | .7% | .8% | .8% | .7% | .8% | .8% | .7% | .7% | .7% | .7% | .7% | .7% | .7% | .7% | .8% | .8% | .8% | .8% |
| Multiple sclerosis | .3% | .3% | .4% | .4% | .3% | .4% | .3% | .4% | .4% | .4% | .4% | .3% | .3% | .4% | .4% | .4% | .4% | .4% | .3% | .3% |
| Anorexia/bulimia | .2% | .2% | .3% | .3% | .3% | .3% | .3% | .3% | .3% | .3% | .3% | .3% | .3% | .3% | .3% | .3% | .3% | .3% | .3% | .3% |
| Stroke | 3% | 3% | 2.9% | 2.9% | 2.8% | 2.9% | 2.9% | 2.8% | 2.9% | 2.9% | 2.7% | 2.8% | 2.6% | 2.7% | 2.7% | 2.7% | 2.6% | 2.6% | 2.6% | 2.5% |
| Vision problem | 7.1% | 7.1% | 7.2% | 7.2% | 6.9% | 6.9% | 7.1% | 7.1% | 6.8% | 6.8% | 6.3% | 6.4% | 6.3% | 6.3% | 6.7% | 6.5% | 6.1% | 6.2% | 5.8% | 5.8% |
| Thyroid disorder | 4.2% | 4.4% | 4.5% | 4.4% | 4.5% | 4.5% | 4.5% | 4.6% | 4.4% | 4.5% | 4.5% | 4.5% | 4.4% | 4.4% | 4.4% | 4.5% | 4.4% | 4.4% | 4.2% | 4.2% |
| Ulcer/chronic gastritis | 1.8% | 1.8% | 1.7% | 1.7% | 1.8% | 1.8% | 1.7% | 1.7% | 1.7% | 1.7% | 1.6% | 1.7% | 1.7% | 1.7% | 1.6% | 1.6% | 1.5% | 1.5% | 1.6% | 1.6% |

**Supplementary Table 4: Outcome variables**

| **Identified in the NHISR:** | | | | |
| --- | --- | --- | --- | --- |
| **Service type** | **Specialty** | **Time code** | **Day of week** | **Service code** |
| **Talk therapy sessions** | 80-89 | All except 8 and 9 | Weekdays | 6101 4003 4021 4022 4023  4024 4025 4026 4027 4050  4063 4106 4247 4248 4249 |
| **Psycho­metric tests** | 80-89 | All except 8 and 9 | Weekdays | 2149 |
| **Psychological treatment** | 63 |  |  | **02**10,14,18,20,23,24,25,26,27,28,29  **03**10,14,18,20,23,24,25,26,27,28,29  **04**10,14,18,20,23,24,25,26,27,28,29  **05**10,14,18,20,23,24,25,26,27,28,29 |
| **Psychiatric treatment** | 24 |  |  | 0XXX |
| **Identified in the NPR** | | | | |
| **Contacts with a public mental hospital** |  |  |  |  |
| **Identified in the Danish Register of Causes of Death** | | | | |
| **Cause of Death** | **Variable code** | **Diagnosis codes (ICD-10)** |  |  |
| **Suicide** | c_liste14=11 | X60-X84, Y87 |  |  |
| **Identified in the DNPR** | | | | |
| **Prescription type** | **Drug codes (ATC)** |  |  |  |
| **Anti­depressants** | N06A excluding N06AX12 |  |  |  |
| **Anti­psychotics** | N05A |  |  |  |
| **Anxiolytics** | N05B |  |  |  |
| **Anti­dementia drugs** | N06D |  |  |  |

**Supplementary Table 5: Socioeconomic variables (identified in the yearly updated registers at Statistics Denmark)**

| **Highest attained educational level** |
| --- |
| > 15 years |
| 10-15 years |
| < 10 years |
| **Cohabitation status** |
| Married or registered partnership |
| Cohabiting |
| Living alone |
| **Immigration status** |
| Danish |
| Western immigrant |
| Non-western immigrant |
| **Family income** |
| 1st quintile in that year |
| 2nd quintile inthat year |
| 3rd quintile inthat year |
| 4th quintile inthat year |
| 5th quintile inthat year |
| Negative or no income inthat year |

**Supplementary Table 6: Comorbidity**

| **Category** | **Disease group** | **Coding definition** | **Diagnosis codes (ICD-10)** | **Diagnosis time frame** | **Drug codes (ATC)** | **Prescription time frame** |
| --- | --- | --- | --- | --- | --- | --- |
| **Circulatory system** | **Hypertension** | Diagnosis AND/OR prescriptions of antihypertensives, if not ischemic heart disease or heart failure (or kidney disease: only diuretics) | I10-I13, I15 | Ever | C02, C04, C07, C08, C09, C03 | Twice last year |
|  | **Dyslipidemia** | Diagnosis AND/OR drug prescription for lipid-lowering drugs if not ischemic heart disease | E78 | Last two years | C10 | Twice last year |
|  | **Ischemic heart disease** | Diagnosis AND/OR prescription for antianginal drug | I20-I25 | Ever | C01DA | Twice last year |
|  | **Atrial fibrillation** | Diagnosis | I48 | Ever |  |  |
|  | **Heart failure** | Diagnosis | I50 | Ever |  |  |
|  | **Peripheral artery occlusive disease** | Diagnosis | I70-I74 | Ever |  |  |
|  | **Stroke** | Diagnosis | I60-I64, I69 | Ever |  |  |
| **Endocrine system** | **Diabetes mellitus** | Diagnosis AND/OR prescription of antidiabetics | E10-E14 | Ever | A10A, A10B | Twice last year |
|  | **Thyroid disorder** | Diagnosis AND/OR prescription of thyroid therapy drugs | E00-E05, E061-E069, E07 | Last two years | H03 | Twice last year |
|  | **Gout** | Diagnosis | E79, M10 | Ever |  |  |
| **Pulmonary system and allergy** | **Chronic pulmonary disease** | Prescription for obstructive airway disease drugs |  |  | R03 | Twice last year |
|  | **Allergy** | Prescription for non-sedative antihistamines AND/OR nasal antiallergics |  |  | R06AX, R06AE07, R06AE09, R01AC, R01AD | Twice last year |
| **Gastrointestinal system** | **Ulcer/chronic gastritis** | Diagnosis | K221, K25-K28, K293-K295 | Ever |  |  |
|  | **Chronic liver disease** | Diagnosis | B16-B19, K70-K74, K766, I85 | Ever |  |  |
|  | **Inflammatory bowel disease** | Diagnosis | K50-K51 | Ever |  |  |
|  | **Diverticular disease of intestine** | Diagnosis | K57 | Ever |  |  |
| **Urogenital system** | **Chronic kidney disease** | Diagnosis | N03, N11, N18-N19 | Ever |  |  |
|  | **Prostate disorders** | Diagnosis AND/OR prescription of prostate hyperplasia therapy drugs | N40 | Ever | C02CA, G04C | Twice last year |
| **Musculoskeletal system** | **Connective tissue disorders** | Diagnosis | M05-M06, M08-M09, M30-M36, D86 | Ever |  |  |
|  | **Osteoporosis** | Diagnosis AND/OR prescription for osteoporosis drugs | M80-M82 | Ever | M05B, G03XC01, H05AA | Twice last year |
|  | **Painful condition** | Repeated prescriptions of analgesics |  |  | N02A, N02BA51, N02BE, M01A, M02A | Four times last year |
| **Hematological system** | **HIV/AIDS** | Diagnosis | B20-B24 | Ever |  |  |
|  | **Anemias** | Diagnosis | D50-D53, D55-D59, D60-D61, D63-D64 | Last two years |  |  |
| **Cancers** | **Cancer** | Diagnosis | C00-C43, C45-C97 | Last five years |  |  |
| **Neurological system** | **Vision problem** | Diagnosis | H40, H25, H54 | Ever |  |  |
|  | **Hearing problem** | Diagnosis | H90-H91, H931 | Ever |  |  |
|  | **Migraine** | Diagnosis AND/OR prescription of specific antimigraine drugs | G43 | Last two years | N02C | Twice last year |
|  | **Epilepsy** | Diagnosis AND prescription of antiepileptics | G40-G47 | Ever | N03 | Twice last year |
|  | **Parkinson's disease** | Diagnosis | G20-G22 | Ever |  |  |
|  | **Multiple sclerosis** | Diagnosis | G35 | Ever |  |  |
|  | **Neuropathies** | Diagnosis | G50-G64 | Last two years |  |  |
| **Mental health conditions** | **Mood, stress-related, or anxiety disorders** | Diagnosis | F32-F34, F40-F48 | Last two years |  |  |
|  | **Psychological distress** | Prescription of antidepressants if not other mental disorder |  |  | N06A | Twice last year |
|  | **Alcohol problems** | Diagnosis | F101-F109 | Last two years |  |  |
|  | **Substance abuse** | Diagnosis | F11-F16, F18-F19 | Last two years |  |  |
|  | **Anorexia/bulimia** | Diagnosis | F50 | Last two years |  |  |
|  | **Bipolar affective disorder** | Diagnosis AND/OR prescription of lithium salts | F30-F31 | Ever | N05AN | Twice last year |
|  | **Schizophrenia or schizoaffective disorder** | Diagnosis | F20, F25 | Ever |  |  |
|  | **Dementia** | Diagnosis AND/OR prescription of antidementia drugs | F00-F03, F051, G30 | Ever | N06D | Twice last year |

| **Supplementary Figure 1:** **IRRs of treatment regimens and medicine redemption by decile groups of the observed over expected ratio among those aged < 75 years** |
| --- |
